# Supplementary material for: Spatial and Species Variations of Bacterial Community Structure and Putative Function in Seagrass Rhizosphere Sediment
Source: MDPI journal article supplement (doi:10.3390/life11080852), 2021-08-20
Supplement: s1 [file s1]

# Spatial and Species Variations of Bacterial Community Structure and Putative Function in Seagrass Rhizosphere Sediment

Juan Ling <sup>1,2,3,4</sup>, Weiguo Zhou <sup>1,2,3,4</sup>, Qingsong Yang <sup>1,2,3,4</sup>, Jianping Yin <sup>1,2</sup>, Jian Zhang <sup>1,5</sup>, Qiuying Peng <sup>1,5</sup>, Xiaofang Huang <sup>1,5</sup>, Yuhang Zhang <sup>1,5</sup> and Junde Dong <sup>1,2,3,4\*</sup>

- <sup>1</sup> CAS Key Laboratory of Tropical Marine Bio-resources and Ecology, Guangdong Provincial Key Laboratory of Applied Marine Biology, South China Sea Institute of Oceanology, Chinese Academy of Sciences, Guangzhou 510301, China; lingjuan@scsio.ac.cn (J.L.); zhouweiguo@scsio.ac.cn (W.Z.); qsyang@scsio.ac.cn (Q.Y.); yjp@scsio.ac.cn (J.Y.); zhangjian196@mails.ucas.ac.cn (J.Z.); pengqiuying18@mails.ucas.edu.cn (Q.P.); huangxiaofang602@126.com (X.H.); zhangyuhang20@mails.ucas.ac.cn (Y.Z.)
  - <sup>2</sup> Southern Marine Science and Engineering Guangdong Laboratory (Guangzhou), Guangzhou 511458, China
  - <sup>3</sup> Key Laboratory of Tropical Marine Biotechnology of Hainan Province, Sanya Institute of Oceanology, SCSIO; Sanya National Marine Ecosystem Research Station, Chinese Academy of Sciences, Sanya 572000, China
  - <sup>4</sup> Innovation Academy of South China Sea Ecology and Environmental Engineering, Chinese Academy of Sciences, Guangzhou 511458, China
  - <sup>5</sup> College of Earth and Planetary Sciences, University of Chinese Academy of Sciences, Beijing 100049, China
- \* Correspondence: dongjd@scsio.ac.cn; Tel.: +86-20-8910-7830

**Citation:** Ling, J.; Zhou, W.; Yang, Q.; Yin, J.; Zhang, J.; Peng, Q.; Huang, X.; Zhang, Y.; Dong, J. Spatial and Species Variations of Bacterial Community Structure and Putative Function in Seagrass Rhizosphere Sediment. *Life* **2021**, *11*, 852. <https://doi.org/10.3390/life11080852>

Academic Editor: Fabia U. Battistuzzi

Received: 6 July 2021

Accepted: 11 August 2021

Published: 20 August 2021

**Publisher's Note:** MDPI stays neutral with regard to jurisdictional claims in published maps and institutional affiliations.

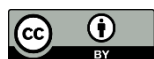

**Copyright:** © 2021 by the authors. Submitted for possible open access publication under the terms and conditions of the Creative Commons Attribution (CC BY) license (<http://creativecommons.org/licenses/by/4.0/>).

**Table S1.** The sequences characteristics of the all obtained seagrass rhizosphere samples

| <b>Coral reef ecosystems</b> | <b>Sample ID</b>      | <b>Raw reads</b> | <b>Resampling depth</b> | <b>Good's coverage</b> |
|------------------------------|-----------------------|------------------|-------------------------|------------------------|
| <b>Daya Bay</b>              | DYH1                  | 40,990           | 33,980                  | 99.30%                 |
|                              | DYH2                  | 41,929           | 33,980                  | 99.32%                 |
|                              | DYH3                  | 39,296           | 33,980                  | 99.31%                 |
| <b>Sanya Bay</b>             | SYT1                  | 56,671           | 33,980                  | 99.07%                 |
|                              | SYT2                  | 54,384           | 33,980                  | 99.12%                 |
|                              | SYT3                  | 42,129           | 33,980                  | 98.99%                 |
| <b>Xisha Islands</b>         | XSC1                  | 60,954           | 33,980                  | 98.96%                 |
|                              | XSC2                  | 67,941           | 33,980                  | 99.06%                 |
|                              | XSC3                  | 66,866           | 33,980                  | 99.02%                 |
|                              | XST1                  | 52,168           | 33,980                  | 99.13%                 |
|                              | XST2                  | 59,573           | 33,980                  | 98.99%                 |
|                              | XST3                  | 61,669           | 33,980                  | 99.11%                 |
|                              | XSH1                  | 60,647           | 33,980                  | 99.01%                 |
|                              | XSH2                  | 55,494           | 33,980                  | 99.02%                 |
|                              | XSH3                  | 63,638           | 33,980                  | 99.03%                 |
|                              | XSC1                  | 64,324           | 33,980                  | 99.14%                 |
|                              | XSC2                  | 60,165           | 33,980                  | 99.06%                 |
|                              | XSC3                  | 69,321           | 33,980                  | 99.02%                 |
|                              | <b>Nansha Islands</b> | NSH1             | 68,758.                 | 99.05%                 |
|                              |                       | NSH2             | 69,867                  | 99.16%                 |
|                              |                       | NSH3             | 68,918                  | 99.10%                 |
|                              |                       | NST1             | 35,823                  | 99.16%                 |
|                              |                       | NST2             | 36,958                  | 99.20%                 |
|                              |                       | NST3             | 33,987                  | 99.23%                 |

**Table S2.** The significance of differences in taxonomy structure of microbial community between different seagrass species and seagrass *T. hemprichii* and *H. ovalis* from different sampling sites on the genus level

| Genus                               | XSH-XSS          | XST-XSH         | XSC-XSS          | XST-XSS          | XSH-XSS          | XST-XSC          |
|-------------------------------------|------------------|-----------------|------------------|------------------|------------------|------------------|
| <i>Bacillus</i>                     | 0.0904           | 0.2509          | 0.0904           | <b>0.0117*</b>   | 0.749            | <b>0.0007***</b> |
| <i>Unclassified</i>                 |                  |                 |                  |                  |                  |                  |
| <i>Desulfobulbaceae</i>             | <b>0.0018**</b>  | 0.7373          | <b>0.0018**</b>  | 0.1672           | <b>0.0022**</b>  | 0.484            |
| <i>Unclassified</i>                 |                  |                 |                  |                  |                  |                  |
| <i>Rhodobacteraceae</i>             | <b>0***</b>      | 0.455           | <b>0***</b>      | 0.6376           | 0.5732           | <b>0***</b>      |
| <i>Unclassified Bacillaceae2</i>    | 0.1425           | 0.3012          | 0.1425           | <b>0.0246*</b>   | 0.7447           | <b>0.0037**</b>  |
| <i>Lactococcus</i>                  | 0.0934           | 0.2651          | 0.0934           | <b>0.0154*</b>   | 0.589            | <b>0.0009***</b> |
| <i>Unclassified</i>                 |                  |                 |                  |                  |                  |                  |
| <i>Desulfobacteraceae</i>           | <b>0.0003***</b> | 0.4841          | <b>0.0003***</b> | 0.9566           | 0.2523           | <b>0.0069**</b>  |
| <i>Unclassified</i>                 |                  |                 |                  |                  |                  |                  |
| <i>Gammaproteobacteria</i>          | 0.7368           | 0.2962          | 0.7368           | <b>0.002**</b>   | <b>0.0119*</b>   | <b>0.0021**</b>  |
| <i>Unclassified Bacillaceae1</i>    | 0.5845           | 0.3944          | 0.5845           | <b>0.0401*</b>   | 0.3919           | <b>0.0033**</b>  |
| <i>Desulfopila</i>                  | 0.7858           | 0.9306          | 0.7858           | 0.4427           | 0.4277           | 0.5615           |
| <i>Unclassified Chloroflexi</i>     | <b>0.0166*</b>   | 0.1042          | <b>0.0166*</b>   | 0.0739           | 0.3986           | 0.0049**         |
| <i>Unclassified Actinobacteria</i>  | 0.1762           | <b>0.033*</b>   | 0.1762           | <b>0.0489*</b>   | <b>0.0009***</b> | 0.2209           |
| <i>Unclassified</i>                 |                  |                 |                  |                  |                  |                  |
| <i>Flavobacteriaceae</i>            | <b>0.0124*</b>   | 0.9839          | <b>0.0124*</b>   | <b>0.0047**</b>  | <b>0.0091**</b>  | <b>0.0161*</b>   |
| <i>Unclassified</i>                 |                  |                 |                  |                  |                  |                  |
| <i>Bacteroidetes</i>                | <b>0.0221*</b>   | 0.1013          | <b>0.0221*</b>   | 0.1726           | 0.3916           | <b>0.0191*</b>   |
| <i>Unclassified</i>                 |                  |                 |                  |                  |                  |                  |
| <i>Anaerolineaceae</i>              | 0.4537           | 0.3712          | 0.4537           | 0.0899           | 0.7356           | <b>0.0291*</b>   |
| <i>Gp23</i>                         | <b>0.0121*</b>   | 0.0759          | <b>0.0121*</b>   | <b>0.0284*</b>   | 0.4346           | 0.3217           |
| <i>Actibacter</i>                   | <b>0.0001***</b> | 0.455           | <b>0.0001***</b> | <b>0.0363*</b>   | <b>0.0134*</b>   | 0.2008           |
| <i>Unclassified</i>                 |                  |                 |                  |                  |                  |                  |
| <i>Deltaproteobacteria</i>          | <b>0.0006***</b> | 0.0826          | <b>0.0006***</b> | 0.0516           | <b>0.0269*</b>   | <b>0.0005***</b> |
| <i>Unclassified Chromatiales</i>    | <b>0.0104*</b>   | 0.7138          | <b>0.0104*</b>   | <b>0.0011**</b>  | <b>0.0166*</b>   | <b>0.0004***</b> |
| <i>Sulfurovum</i>                   | <b>0***</b>      | 0.8582          | <b>0***</b>      | <b>0***</b>      | 0.1465           | <b>0***</b>      |
| <i>Unclassified Myxococcales</i>    | 0.0913           | <b>0.0266*</b>  | 0.0913           | 0.4293           | 0.0617           | 0.413            |
| <i>Unclassified</i>                 |                  |                 |                  |                  |                  |                  |
| <i>Ignavibacteriaceae</i>           | <b>0.0057**</b>  | 0.7954          | <b>0.0057**</b>  | 0.331            | 0.5594           | 0.0589           |
| <i>Unclassified Spirochaetaceae</i> | <b>0.0255*</b>   | 0.3537          | <b>0.0255*</b>   | 0.213            | <b>0.001**</b>   | 0.9391           |
| <i>Gp10</i>                         | <b>0.0055**</b>  | 0.9134          | <b>0.0055**</b>  | 0.1297           | <b>0.0474*</b>   | 0.2242           |
| <i>Gp21</i>                         | <b>0.021*</b>    | 0.4181          | <b>0.021*</b>    | 0.8677           | 0.3317           | <b>0.0062**</b>  |
| <i>Desulfatiglans</i>               | <b>0.0001***</b> | 0.0743          | <b>0.0001***</b> | 0.2739           | 0.0492*          | <b>0.0257*</b>   |
| <i>Caldithrix</i>                   | <b>0.6846</b>    | <b>0.2567</b>   | <b>0.6846</b>    | <b>0.0518</b>    | <b>0.0848</b>    | <b>0.0605</b>    |
| <i>Unclassified</i>                 |                  |                 |                  |                  |                  |                  |
| <i>Thioalkalspiraceae</i>           | 0.7099           | 0.445           | 0.7099           | <b>0.0163*</b>   | <b>0.0206*</b>   | <b>0.0173*</b>   |
| <i>Zooshikella</i>                  | 0.1012           | 0.2861          | 0.1012           | <b>0.0042**</b>  | 0.0887           | <b>0.0048**</b>  |
| <i>Unclassified</i>                 |                  |                 |                  |                  |                  |                  |
| <i>Planctomycetaceae</i>            | 0.7568           | 0.2933          | 0.7568           | <b>0.033*</b>    | <b>0.0074**</b>  | <b>0.0639</b>    |
| <i>Gp22</i>                         | <b>0.0035**</b>  | <b>0.0448*</b>  | <b>0.0035**</b>  | 0.3546           | <b>0.0175*</b>   | <b>0.0319*</b>   |
| <i>Unclassified Proteobacteria</i>  | <b>0.0387*</b>   | 0.2097          | <b>0.0387*</b>   | 0.7704           | <b>0.0449*</b>   | 0.0562           |
| <i>Spirochaeta</i>                  | <b>0.4012</b>    | <b>0.8579</b>   | <b>0.4012</b>    | <b>0.3762</b>    | <b>0.1655</b>    | <b>0.2763</b>    |
| <i>Unclassified Cytophagales</i>    | <b>0.004**</b>   | 0.0615          | <b>0.004**</b>   | <b>0.0152*</b>   | 0.1813           | 0.238            |
| <i>Robiginitalea</i>                | 0.0684           | 0.6396          | 0.0684           | <b>0.0132*</b>   | 0.2529           | 0.0002***        |
| <i>Unclassified</i>                 |                  |                 |                  |                  |                  |                  |
| <i>Bacteroidales</i>                | 0.6173           | 0.2174          | 0.6173           | 0.1695           | 0.9449           | 0.1407           |
| <i>Aquabacterium</i>                | 0.7616           | 0.4464          | 0.7616           | <b>0.0439*</b>   | <b>0.0344*</b>   | <b>0.0467*</b>   |
| <i>Oceanobacillus</i>               | 0.1061           | 0.1572          | 0.1061           | <b>0.0135*</b>   | 0.6601           | <b>0.0036**</b>  |
| <i>Gp9</i>                          | <b>0.0005***</b> | 0.2238          | <b>0.0005***</b> | <b>0.0128*</b>   | <b>0.0002***</b> | 0.0577           |
| <i>Unclassified</i>                 |                  |                 |                  |                  |                  |                  |
| <i>Helicobacteraceae</i>            | 1                | 0.1398          | 1                | <b>0.0485*</b>   | 0.0837           | <b>0.0485*</b>   |
| <i>Unclassified</i>                 |                  |                 |                  |                  |                  |                  |
| <i>Prolixibacteraceae</i>           | 0.2753           | 0.9885          | 0.2753           | <b>0.0277*</b>   | <b>0.0499*</b>   | <b>0.0394*</b>   |
| <i>Latescibacteria</i>              |                  |                 |                  |                  |                  |                  |
| <i>genera incertae sedis</i>        | <b>0.0012**</b>  | 0.1555          | <b>0.0012**</b>  | <b>0.0004***</b> | 0.814            | 0.1009           |
| <i>Eudoraea</i>                     | 1                | 0.0809          | 1                | 1                | 0.0809           | 1                |
| <i>Unclassified</i>                 |                  |                 |                  |                  |                  |                  |
| <i>Flammeovirgaceae</i>             | <b>0.015*</b>    | 0.0553          | <b>0.015*</b>    | <b>0.0031**</b>  | <b>0.0348*</b>   | 0.1984           |
| <i>Unclassified</i>                 |                  |                 |                  |                  |                  |                  |
| <i>Syntrophobacterales</i>          | 0.2508           | <b>0.0033**</b> | 0.2508           | <b>0.0025**</b>  | <b>0.0274*</b>   | <b>0.0009***</b> |
| <i>Desulfobulbus</i>                | 0.1346           | 0.0883          | 0.1346           | 0.0057**         | 0.5553           | <b>0.0013**</b>  |
| <i>Aminicenantes genera</i>         |                  |                 |                  |                  |                  |                  |
| <i>incertae sedis</i>               | <b>0.01**</b>    | 0.9808          | <b>0.01**</b>    | <b>0***</b>      | <b>0***</b>      | <b>0.0015**</b>  |
| <i>Unclassified Euryarchaeota</i>   | 0.3486           | 0.1155          | 0.3486           | 0.2168           | 0.0776           | 0.1431           |

|                        |                |        |                |                |                |                  |
|------------------------|----------------|--------|----------------|----------------|----------------|------------------|
| <i>Desulfosarcina</i>  | 0.0863         | 0.92   | 0.0863         | <b>0.0138*</b> | <b>0.022*</b>  | <b>0.0298*</b>   |
| <i>Haliea</i>          | 0.1432         | 0.3809 | 0.1432         | <b>0.0114*</b> | <b>0.0487*</b> | <b>0.0068**</b>  |
| <i>Exiguobacterium</i> | <b>0.0262*</b> | 0.2115 | <b>0.0262*</b> | <b>0.0167*</b> | 0.917          | <b>0.0009***</b> |

**Note:** DYH indicates seagrass *Halophila ovalis* from Daya Bay; SYT indicates seagrass *Thalassia hemprichii* from Sanya Bay, XST, XSH, XSC, and XSS indicate *T. hemprichii*, *H. ovalis*, *Cymodocea nodos* and *Syringodium isoetifolium* collected from the Xisha Islands, and NSH and NST indicates seagrass *H. ovalis* and *T. hemprichii* collected from the Nansha Islands; Values in the table represent *p* values (\*  $p < 0.05$ , \*\*  $p < 0.01$ , and \*\*\*  $p < 0.001$ )

**Table S3.** The significance of differences in taxonomy structure of microbial community between seagrass *H. ovalis* from different sampling sites on the genus level.

| Genus                                        | XS-NS            | NS-SY            | XS-DY            |
|----------------------------------------------|------------------|------------------|------------------|
| <i>Bacillus</i>                              | <b>0.0217*</b>   | <b>0.0001***</b> | 0.06             |
| <i>Unclassified Desulfobulbaceae</i>         | <b>0.0072**</b>  | <b>0.0062**</b>  | <b>0.0113*</b>   |
| <i>Unclassified Rhodobacteraceae</i>         | <b>0.0013**</b>  | 0.8764           | <b>0.001***</b>  |
| <i>Unclassified Bacillaceae2</i>             | <b>0.0053**</b>  | 0.0302*          | 0.2196           |
| <i>Lactococcus</i>                           | <b>0.0241*</b>   | <b>0.01*</b>     | <b>0.0238*</b>   |
| <i>Unclassified Desulfobacteraceae</i>       | 0.2376           | <b>0.0103*</b>   | <b>0.0095**</b>  |
| <i>Unclassified Gammaproteobacteria</i>      | <b>0***</b>      | <b>0.0001***</b> | <b>0.0021**</b>  |
| <i>Unclassified Bacillaceae1</i>             | <b>0.0076**</b>  | <b>0.0298*</b>   | 0.1974           |
| <i>Desulfopila</i>                           | 0.0614           | 0.1807           | 0.9682           |
| <i>Unclassified Chloroflexi</i>              | <b>0.0401*</b>   | <b>0.0255*</b>   | <b>0.0222*</b>   |
| <i>Unclassified Actinobacteria</i>           | <b>0.0162*</b>   | <b>0.0121*</b>   | <b>0.0278*</b>   |
| <i>Unclassified Flavobacteriaceae</i>        | 0.0007***        | 0.4402           | 0.0174*          |
| <i>Unclassified Bacteroidetes</i>            | 0.0648           | <b>0.0011**</b>  | <b>0.001***</b>  |
| <i>Unclassified Anaerolineaceae</i>          | <b>0.0008***</b> | <b>0.0279*</b>   | <b>0.0021**</b>  |
| <i>Gp23</i>                                  | <b>0.047*</b>    | <b>0.0014**</b>  | <b>0.0086**</b>  |
| <i>Actibacter</i>                            | <b>0.0334*</b>   | <b>0.0002***</b> | <b>0.0019**</b>  |
| <i>Unclassified Deltaproteobacteria</i>      | 0.0541           | <b>0.0469*</b>   | <b>0.0112*</b>   |
| <i>Unclassified Chromatiales</i>             | <b>0.0071**</b>  | <b>0.0043**</b>  | 0.2486           |
| <i>Sulfurovum</i>                            | <b>0.0322*</b>   | <b>0.0017**</b>  | 0.0662           |
| <i>Unclassified Myxococcales</i>             | <b>0.0001***</b> | 0.0886           | <b>0.0216*</b>   |
| <i>Unclassified Ignavibacteriaceae</i>       | <b>0.0105*</b>   | <b>0.0011**</b>  | 0.0694           |
| <i>Unclassified Spirochaetaceae</i>          | <b>0.0034**</b>  | <b>0.0047**</b>  | 0.0973           |
| <i>Gp10</i>                                  | <b>0.0021**</b>  | 0.1651           | <b>0.0098**</b>  |
| <i>Gp21</i>                                  | 0.1402           | <b>0.0022**</b>  | <b>0.0069**</b>  |
| <i>Desulfatiglans</i>                        | <b>0.0267*</b>   | <b>0.0143*</b>   | <b>0.0107*</b>   |
| <i>Caldithrix</i>                            | <b>0.0224*</b>   | <b>0.0111*</b>   | <b>0.0003***</b> |
| <i>Unclassified Thioalkalspiraceae</i>       | <b>0.0029**</b>  | <b>0.0007***</b> | 0.0742           |
| <i>Zooshikella</i>                           | <b>0.0177*</b>   | 0.2157           | <b>0.0047**</b>  |
| <i>Unclassified Planctomycetaceae</i>        | <b>0.0029**</b>  | 0.0944           | 0.2385           |
| <i>Gp22</i>                                  | <b>0.0061**</b>  | <b>0.0002***</b> | <b>0.0017**</b>  |
| <i>Unclassified Proteobacteria</i>           | <b>0.0279*</b>   | 0.1467           | 0.69430          |
| <i>Spirochaeta</i>                           | <b>0.0001***</b> | <b>0.0002***</b> | <b>0.0096**</b>  |
| <i>Unclassified Cytophagales</i>             | 0.2869           | <b>0.0043**</b>  | <b>0.0008***</b> |
| <i>Robiginitalea</i>                         | 0.0898           | <b>0.0019**</b>  | <b>0.0132*</b>   |
| <i>Unclassified Bacteroidales</i>            | <b>0.0035**</b>  | <b>0***</b>      | <b>0.0014**</b>  |
| <i>Aquabacterium</i>                         | <b>0.0016**</b>  | <b>0.0015**</b>  | <b>0.0015**</b>  |
| <i>Oceanobacillus</i>                        | 0.1159           | 0.0935           | 0.3783           |
| <i>Gp9</i>                                   | <b>0.0005***</b> | <b>0.0003***</b> | 0.1839           |
| <i>Unclassified Helicobacteraceae</i>        | <b>0.0279*</b>   | <b>0.03*</b>     | 0.0955           |
| <i>Unclassified Prolixibacteraceae</i>       | <b>0.0071**</b>  | <b>0.008**</b>   | 0.2985           |
| <i>Latescibacteria genera incertae sedis</i> | 0.7897           | 0.0501           | <b>0.0014**</b>  |
| <i>Eudoraea</i>                              | NA               | NA               | NA               |
| <i>Unclassified Flammeovirgaceae</i>         | <b>0.0169*</b>   | 0.4373           | 0.1487           |
| <i>Unclassified Syntrophobacterales</i>      | 0.0847           | 0.087            | 0.8124           |
| <i>Desulfobulbus</i>                         | 0.5495           | 0.3128           | 0.2921           |
| <i>Aminicenantes genera incertae sedis</i>   | <b>0.0211*</b>   | 0.4574           | <b>0.0179*</b>   |
| <i>Unclassified Euryarchaeota</i>            | <b>0.0069**</b>  | <b>0.0128*</b>   | <b>0.1296</b>    |
| <i>Desulfosarcina</i>                        | <b>0.0028**</b>  | 0.3646           | <b>0.0004***</b> |
| <i>Haliea</i>                                | <b>0.0163*</b>   | 0.2285           | <b>0***</b>      |
| <i>Exiguobacterium</i>                       | <b>0.0028**</b>  | <b>0.0011**</b>  | 0.0636           |

**Note:** ND means not available; (DYH indicates seagrass *Halophila ovalis* from Daya Bay; SYT indicates seagrass *Thalassia hemprichii* from Sanya Bay, XST, XSH, XSC, and XSS indicate *T. hemprichii*, *H. ovalis*, *Cymodocea nodos* and *Syringodium isoetifolium* collected from the Xisha Islands, and NSH and NST indicates seagrass *H. ovalis* and *T. hemprichii* collected from the Nansha Islands; Values in the table represent *p* values (\* *p* < 0.05, \*\* *p* < 0.01, and \*\*\* *p* < 0.001)

**Table S4.** The significance of differences in taxonomy structure of microbial community between seagrass *T. hemprichii* from different sampling sites on the genus level.

| Genus                                        | XS-DY            | NS-DY            | XS-NS            |
|----------------------------------------------|------------------|------------------|------------------|
| <i>Bacillus</i>                              | <b>0.0012**</b>  | <b>0.0011**</b>  | <b>0.0083**</b>  |
| <i>Unclassified Desulfobulbaceae</i>         | 0.0961           | <b>0.0148*</b>   | 0.1669           |
| <i>Unclassified Rhodobacteraceae</i>         | <b>0.0004***</b> | <b>0.0037**</b>  | <b>0.0461*</b>   |
| <i>Unclassified Bacillaceae 2</i>            | <b>0.0012**</b>  | <b>0.0019**</b>  | <b>0.0006***</b> |
| <i>Lactococcus</i>                           | <b>0***</b>      | <b>0.0008***</b> | <b>0.0013**</b>  |
| <i>Unclassified Desulfobacteraceae</i>       | <b>0.0037**</b>  | <b>0.019*</b>    | <b>0.0055**</b>  |
| <i>Unclassified Gammaproteobacteria</i>      | <b>0***</b>      | 0.0758           | <b>0.0001***</b> |
| <i>Unclassified Bacillaceae1</i>             | <b>0***</b>      | ***              | <b>0.0003***</b> |
| <i>Desulfopila</i>                           | <b>0.0153*</b>   | <b>0.0021**</b>  | <b>0.0024**</b>  |
| <i>Unclassified Chloroflexi</i>              | 0.1893           | <b>0.002**</b>   | <b>0.0059**</b>  |
| <i>Unclassified Actinobacteria</i>           | <b>0.0009***</b> | <b>0.1144</b>    | <b>0.0033**</b>  |
| <i>Unclassified Flavobacteriaceae</i>        | <b>0.0044**</b>  | ***              | <b>0***</b>      |
| <i>Unclassified Bacteroidetes</i>            | <b>0.0001***</b> | <b>0.0017**</b>  | <b>0.0065**</b>  |
| <i>Unclassified Anaerolineaceae</i>          | <b>0***</b>      | <b>0.0001***</b> | <b>0.0002***</b> |
| <i>Gp23</i>                                  | <b>0.0004***</b> | <b>0.0041**</b>  | <b>0.0015**</b>  |
| <i>Actibacter</i>                            | <b>0.0142*</b>   | <b>0.0062**</b>  | <b>0.0028**</b>  |
| <i>Unclassified Deltaproteobacteria</i>      | <b>0.0009***</b> | 0.0602           | <b>0.0005***</b> |
| <i>Unclassified Chromatiales</i>             | <b>0***</b>      | 0.1776           | <b>0.0009***</b> |
| <i>Sulfurovum</i>                            | <b>0.0015**</b>  | <b>0.0014**</b>  | <b>0.0007***</b> |
| <i>Unclassified Myxococcales</i>             | <b>0.0002***</b> | 0.0812           | <b>0.001***</b>  |
| <i>Unclassified Ignavibacteriaceae</i>       | <b>0.0309*</b>   | <b>0.0245*</b>   | 0.0627           |
| <i>Unclassified Spirochaetaceae</i>          | <b>0.005**</b>   | <b>0.0403*</b>   | <b>0.0279*</b>   |
| <i>Gp10</i>                                  | <b>0.0004***</b> | 0.1867           | <b>0***</b>      |
| <i>Gp21</i>                                  | <b>0.0032**</b>  | <b>0.0093**</b>  | <b>0.001**</b>   |
| <i>Desulfatiglans</i>                        | <b>0.0045**</b>  | <b>0.0033**</b>  | <b>0.0165*</b>   |
| <i>Caldithrix</i>                            | <b>0.0006***</b> | <b>0.0007***</b> | <b>0.0164*</b>   |
| <i>Unclassified Thioalkalspiraceae</i>       | <b>0***</b>      | <b>0.003**</b>   | <b>0.0014**</b>  |
| <i>Zooshikella</i>                           | <b>0.0121*</b>   | <b>0.0122*</b>   | 0.4226           |
| <i>Unclassified Planctomycetaceae</i>        | <b>0.0041**</b>  | <b>0.0001***</b> | 0.335            |
| <i>Gp22</i>                                  | <b>0.0053**</b>  | 0.2157           | <b>0.0004***</b> |
| <i>Unclassified Proteobacteria</i>           | <b>0.0015**</b>  | 0.0552           | 0.0981           |
| <i>Spirochaeta</i>                           | <b>0.0027**</b>  | <b>0.007**</b>   | 0.1369           |
| <i>Unclassified Cytophagales</i>             | <b>0.0063**</b>  | <b>0.0253*</b>   | <b>0.0107*</b>   |
| <i>Robiginitalea</i>                         | <b>0.0193*</b>   | <b>0.0106*</b>   | <b>0.0008***</b> |
| <i>Unclassified Bacteroidales</i>            | <b>0.0003***</b> | <b>0.0001***</b> | 0.1061           |
| <i>Aquabacterium</i>                         | <b>0.0124*</b>   | <b>0.011*</b>    | <b>0.0055**</b>  |
| <i>Oceanobacillus</i>                        | <b>0.0251*</b>   | <b>0.0066**</b>  | 0.0507           |
| <i>Gp9</i>                                   | <b>0.0012**</b>  | <b>0.0116*</b>   | <b>0.0474*</b>   |
| <i>Unclassified Helicobacteraceae</i>        | <b>0.0083**</b>  | <b>0.0083**</b>  | 1                |
| <i>Unclassified Prolixibacteraceae</i>       | <b>0.0077**</b>  | <b>0.0113*</b>   | <b>0.0057**</b>  |
| <i>Latescibacteria genera incertae sedis</i> | <b>0.0001***</b> | <b>0.0002***</b> | 0.1574           |
| <i>Eudoraea</i>                              | <b>0.001***</b>  | <b>0.001***</b>  | 1                |
| <i>Unclassified Flammeovirgaceae</i>         | <b>0.0032**</b>  | 0.0664           | <b>0.011*</b>    |
| <i>Unclassified Syntrophobacterales</i>      | <b>0.0001***</b> | 0.261            | <b>0.0177*</b>   |
| <i>Desulfobulbus</i>                         | <b>0.0267*</b>   | <b>0.0246*</b>   | 0.1649           |
| <i>Aminicenantes genera incertae sedis</i>   | 0.4785           | <b>0.0017**</b>  | <b>0.0029**</b>  |
| <i>Unclassified Euryarchaeota</i>            | <b>0.0052**</b>  | <b>0.0058**</b>  | <b>0.0003***</b> |
| <i>Desulfosarcina</i>                        | 0.0675           | 0.079            | 0.0509           |
| <i>Haliaea</i>                               | <b>0.009**</b>   | <b>0.0117*</b>   | <b>0.041*</b>    |
| <i>Exiguobacterium</i>                       | <b>0.0145*</b>   | <b>0.0007***</b> | <b>0.0399*</b>   |

**Note:** DYH indicates seagrass *Halophila ovalis* from Daya Bay; SYT indicates seagrass *Thalassia hemprichii* from Sanya Bay, XST, XSH, XSC, and XSS indicate *T. hemprichii*, *H. ovalis*, *Cymodocea nodos* and *Syringodium isoetifolium* collected from the Xisha Islands, and NSH and NST indicates seagrass *H. ovalis* and *T.*

*hemprichii* collected from the Nansha Islands; Values values in the table represent  $p$  values (\*  $p < 0.05$ , \*\*  $p < 0.01$ , and \*\*\*  $p < 0.001$ ).

**Table S5.** The significance of differences in functional groups of microbial community between different seagrass species on the genus level.

| Functional groups                                                   | XST-XSC          | XSH-XSC         | XSS-XSC         | XST-XSS        | XSH-XSS          | XSH-XST         |
|---------------------------------------------------------------------|------------------|-----------------|-----------------|----------------|------------------|-----------------|
| Methanotrophy                                                       | 0.0628           | 1               | 1               | 0.0628         | 1                | 0.0628          |
| Methanogenesis by reduction of methyl compounds with H <sub>2</sub> | 1                | 1               | 0.6856          | 0.6856         | 0.6856           | 1               |
| Hydrogenotrophic methanogenesis                                     | 1                | 1               | 0.6856          | 0.6856         | 0.6856           | 1               |
| Methanogenesis                                                      | 1                | 1               | 0.6856          | 0.6856         | 0.6856           | 1               |
| Methanol oxidation                                                  | 0.6495           | <b>0.0322*</b>  | <b>0.0106*</b>  | <b>0.0193*</b> | 0.2524           | <b>0.0494*</b>  |
| methylotrophy                                                       | 0.0533           | 0.0766          | <b>0.021*</b>   | 0.0921         | 0.2619           | 0.0706          |
| Aerobic ammonia oxidation                                           | 0.1235           | <b>0.0248*</b>  | <b>0.0189*</b>  | 0.2878         | <b>0.0048**</b>  | 0.0733          |
| Aerobic nitrite oxidation                                           | 0.0728           | 1               | 0.4226          | 0.0765         | 0.4226           | 0.0728          |
| Nitrification                                                       | 0.1164           | <b>0.0248*</b>  | <b>0.0178*</b>  | 0.264          | <b>0.0048**</b>  | 0.071           |
| Sulfate respiration                                                 | <b>0.0161*</b>   | 0.8032          | <b>0.0025**</b> | 0.0645         | <b>0.0005***</b> | <b>0.0111*</b>  |
| Sulfur respiration                                                  | <b>0.0055**</b>  | <b>0.0248*</b>  | 0.3009          | <b>0.0286*</b> | 0.7024           | <b>0.0087**</b> |
| Sulfite respiration                                                 | 0.0514           | 0.3166          | 0.1346          | 0.0661         | 0.0641           | <b>0.0398*</b>  |
| Respiration of sulfur compounds                                     | <b>0.0161*</b>   | 0.8189          | <b>0.0026**</b> | 0.064          | <b>0.0006***</b> | <b>0.0111*</b>  |
| Chitinolysis                                                        | 0.0576           | 0.2567          | 0.1841          | 0.4204         | 1                | 0.5176          |
| Cellulolysis                                                        | <b>0.0453*</b>   | 0.2185          | 0.089           | 0.0779         | 0.2619           | 0.0413*         |
| Xylanolysis                                                         | 0.0576           | 0.2567          | 0.1841          | 0.4204         | 1                | 0.5176          |
| Dark oxidation of sulfur compounds                                  | 0.2846           | 0.1641          | 1               | 0.2846         | 0.1641           | 0.3235          |
| Fermentation                                                        | 0.1872           | <b>0.0032**</b> | 0.083           | 0.0982         | <b>0.002**</b>   | 0.9741          |
| Aerobic chemoheterotrophy                                           | <b>0.0009***</b> | 0.6795          | <b>0.0046**</b> | <b>0***</b>    | <b>0.0221*</b>   | <b>0.0054**</b> |
| Human pathogens all                                                 | <b>0.0168*</b>   | <b>0.0361*</b>  | <b>0.0325*</b>  | 0.3973         | 0.1835           | 0.0559          |
| Animal parasites or symbionts                                       | <b>0.0168*</b>   | <b>0.0361*</b>  | <b>0.0325*</b>  | 0.3973         | 0.1835           | 0.0559          |
| Aromatic compound degradation                                       | 0.3643           | 0.0587          | 0.3944          | 0.1687         | 0.4957           | 0.0572          |
| Hydrocarbon degradation                                             | 0.0572           | 0.1835          | 0.1835          | 0.0602         | 1                | 0.0602          |
| Iron respiration                                                    | 0.1394           | 0.0572          | 0.6495          | 0.1021         | 0.2254           | 0.0634          |
| Nitrate respiration                                                 | 0.0836           | 0.1289          | <b>0.0201*</b>  | 0.3089         | 0.0594           | <b>0.024*</b>   |
| Nitrate reduction                                                   | 0.1349           | 0.1179          | <b>0.0289*</b>  | 0.5014         | 0.0552           | <b>0.0278*</b>  |
| Nitrogen respiration                                                | 0.0836           | 0.1289          | <b>0.0201*</b>  | 0.3089         | 0.0594           | <b>0.024*</b>   |
| Fumarate respiration                                                | 0.1394           | 0.0572          | 0.6495          | 0.1021         | 0.2254           | 0.0634          |
| Intracellular parasites                                             | <b>0.0098**</b>  | 0.2124          | 0.0997          | <b>0.0287*</b> | 0.1454           | <b>0.0039**</b> |
| Predatory or exoparasitic                                           | <b>0.0354*</b>   | <b>0.0311*</b>  | <b>0.0133*</b>  | <b>0.0124*</b> | <b>0.0126*</b>   | 0.1042          |
| Chloroplasts                                                        | 0.1728           | 0.1299          | 0.2837          | <b>0.026*</b>  | <b>0.0086**</b>  | 0.0088**        |
| Anoxygenic photoautotrophy S oxidizing                              | <b>0.0388*</b>   | <b>0.0022**</b> | <b>0.0083**</b> | 0.1605         | <b>0.0105*</b>   | <b>0.0043**</b> |
| Anoxygenic photoautotrophy                                          | <b>0.0388*</b>   | <b>0.0022**</b> | <b>0.0083**</b> | 0.1605         | <b>0.0105*</b>   | <b>0.0043**</b> |
| Photoautotrophy                                                     | <b>0.0388*</b>   | <b>0.0022**</b> | <b>0.0083**</b> | 0.1605         | <b>0.0105*</b>   | <b>0.0043**</b> |
| Phototrophy                                                         | <b>0.0388*</b>   | <b>0.0022**</b> | <b>0.0083**</b> | 0.1605         | <b>0.0105*</b>   | <b>0.0043**</b> |
| Chemoheterotrophy                                                   | <b>0.0179*</b>   | <b>0.0253*</b>  | <b>0.0016**</b> | 0.3086         | <b>0.0008***</b> | <b>0.0071**</b> |

Note: DYH indicates seagrass *Halophila ovalis* from Daya Bay; SYT indicates seagrass *Thalassia hemprichii* from Sanya Bay, XST, XSH, XSC, and XSS indicate *T. hemprichii*, *H. ovalis*, *Cymodocea nodos* and *Syringodium isoetifolium* collected from the Xisha Islands, and NSH and NST indicates seagrass *H. ovalis* and *T. hemprichii* collected from the Nansha Islands; Values in the table represent *p* values (\* *p* < 0.05, \*\* *p* < 0.01, and \*\*\* *p* < 0.001)

**Table S6.** The significance of differences in functional groups of microbial community between seagrass *T.hemprichii* from different sampling sites on the genus level

| Functional groups                                                   | XS-DY            | NS-DY            | XS-NS           |
|---------------------------------------------------------------------|------------------|------------------|-----------------|
| Methanotrophy                                                       | <b>0.0064**</b>  | <b>0.0064**</b>  | 1               |
| Methanogenesis by reduction of methyl compounds with H <sub>2</sub> | <b>0.0064**</b>  | <b>0.0064**</b>  | 1               |
| Hydrogenotrophic methanogenesis                                     | <b>0.0064**</b>  | <b>0.0064**</b>  | 1               |
| Methanogenesis                                                      | 0.2557           | <b>0.0056**</b>  | <b>0.0023**</b> |
| Methanol oxidation                                                  | <b>0.0047**</b>  | <b>0.0108*</b>   | <b>0.0061**</b> |
| methylo trophy                                                      | 0.1791           | 0.5788           | 0.0511          |
| Aerobic ammonia oxidation                                           | 1                | 0.4226           | 0.4226          |
| Aerobic nitrite oxidation                                           | 0.1791           | 0.5437           | 0.0621          |
| Nitrification                                                       | <b>0.0002***</b> | <b>0.0002***</b> | <b>0.0183*</b>  |
| Sulfate respiration                                                 | <b>0.0048**</b>  | 0.077            | 0.2981          |
| Sulfur respiration                                                  | <b>0.0267*</b>   | <b>0.0246*</b>   | 0.1649          |
| Sulfite respiration                                                 | <b>0.0002***</b> | <b>0.0002***</b> | 0.0182*         |
| Respiration of sulfur compounds                                     | 0.3841           | 0.0824           | 0.8194          |
| Chitinolysis                                                        | <b>0.0289*</b>   | <b>0.0017**</b>  | 0.4048          |
| Cellulolysis                                                        | 0.3841           | 0.0824           | 0.8194          |
| Xylanolysis                                                         | <b>0.0069**</b>  | 0.7127           | <b>0.0231*</b>  |
| Dark oxidation of sulfur compounds                                  | <b>0***</b>      | <b>0***</b>      | <b>0.0369*</b>  |
| Fermentation                                                        | 0.2719           | <b>0.0023**</b>  | <b>0.0039**</b> |
| Aerobic chemoheterotrophy                                           | <b>0.0057**</b>  | <b>0.0027**</b>  | 0.0622          |
| Human pathogens all                                                 | <b>0.0057**</b>  | <b>0.0027**</b>  | 0.0622          |
| Animal parasites or symbionts                                       | 1                | 0.0702           | 0.0702          |
| Aromatic compound degradation                                       | <b>0.0005***</b> | <b>0.0232*</b>   | 0.1072          |
| Hydrocarbon degradation                                             | 0.1835           | <b>0.0445*</b>   | <b>0.0459*</b>  |
| Iron respiration                                                    | 0.4226           | 0.077            | 0.0741          |
| Nitrate respiration                                                 | <b>0.0124*</b>   | 0.0635           | <b>0.0113*</b>  |
| Nitrate reduction                                                   | <b>0.0086**</b>  | <b>0.0052**</b>  | <b>0.0054**</b> |
| Nitrogen respiration                                                | <b>0.0124*</b>   | 0.0635           | <b>0.0113*</b>  |
| Fumarate respiration                                                | 0.4226           | 0.077            | 0.0741          |
| Intracellular parasites                                             | 0.0515           | 0.1219           | 0.5475          |
| Predatory or exoparasitic                                           | 0.2031           | 0.2031           | 1               |
| Chloroplasts                                                        | <b>0.0105*</b>   | <b>0.0156*</b>   | <b>0.0126*</b>  |
| Anoxygenic photoautotrophy S oxidizing                              | 0.2267           | <b>0.0026**</b>  | <b>0.0027**</b> |
| Anoxygenic photoautotrophy                                          | 0.2267           | <b>0.0026**</b>  | <b>0.0027**</b> |
| Photoautotrophy                                                     | 0.2267           | <b>0.0026**</b>  | <b>0.0027**</b> |
| Phototrophy                                                         | 0.2267           | <b>0.0026**</b>  | <b>0.0027**</b> |
| Chemoheterotrophy                                                   | <b>0.0026**</b>  | <b>0.0015**</b>  | <b>0.0467*</b>  |

**Note:** DYH indicates seagrass *Halophila ovalis* from Daya Bay; SYT indicates seagrass *Thalassia hemprichii* from Sanya Bay, XST, XSH, XSC, and XSS indicate *T. hemprichii*, *H. ovalis*, *Cymodocea nodos* and *Syringodium isoetifolium* collected from the Xisha Islands, and NSH and NST indicates seagrass *H. ovalis* and *T. hemprichii* collected from the Nansha Islands; Values in the table represent *p* values (\* *p* < 0.05, \*\* *p* < 0.01, and \*\*\* *p* < 0.001).

**Table S7.** The significance of differences in functional groups of microbial community between different seagrass *H.ovalis* from different sampling sites on the genus level.

| Functional group                                                    | XS vs SY        | NS vs SY         | XS vs NS         |
|---------------------------------------------------------------------|-----------------|------------------|------------------|
| Methanotrophy                                                       | 0.0628          | 0.4226           | 0.0642           |
| Methanogenesis by reduction of methyl compounds with H <sub>2</sub> | 0.4226          | <b>0.0339*</b>   | <b>0.0271*</b>   |
| Hydrogenotrophic methanogenesis                                     | 0.4226          | <b>0.0339*</b>   | <b>0.0271*</b>   |
| Methanogenesis                                                      | 0.4226          | <b>0.0339*</b>   | <b>0.0271*</b>   |
| Methanol oxidation                                                  | <b>0.0201*</b>  | <b>0.0248*</b>   | <b>0.0142*</b>   |
| methylotrophy                                                       | 0.1574          | <b>0.0024**</b>  | 0.2212           |
| Aerobic ammonia oxidation                                           | <b>0.005**</b>  | <b>0.0059**</b>  | 0.3134           |
| Aerobic nitrite oxidation                                           | 0.5185          | 0.7415           | 0.3486           |
| Nitrification                                                       | <b>0.0055**</b> | <b>0.0046**</b>  | 0.3047           |
| Sulfate respiration                                                 | <b>0.0116*</b>  | <b>0.0445*</b>   | <b>0.0155*</b>   |
| Sulfur respiration                                                  | <b>0.0011**</b> | <b>0.0474*</b>   | <b>0.0034**</b>  |
| Sulfite respiration                                                 | 0.2921          | 0.3128           | 0.5495           |
| Respiration of sulfur compounds                                     | <b>0.0116*</b>  | <b>0.0446*</b>   | <b>0.0154*</b>   |
| Chitinolysis                                                        | 0.0505          | 0.353            | 0.1159           |
| Cellulolysis                                                        | 0.1982          | <b>0.0259*</b>   | <b>0.0255*</b>   |
| Xylanolysis                                                         | 0.0505          | 0.353            | 0.1159           |
| Dark oxidation of sulfur compounds                                  | 0.0782          | <b>0.0009***</b> | <b>0.0008***</b> |
| Fermentation                                                        | 0.1204          | 0.1397           | 0.0646           |
| Aerobic chemoheterotrophy                                           | <b>0.0021**</b> | 0.7545           | <b>0.0107*</b>   |
| Human pathogens all                                                 | <b>0.0198*</b>  | 0.1333           | <b>0.0095**</b>  |
| Animal parasites or symbionts                                       | <b>0.0198*</b>  | 0.1333           | <b>0.0095**</b>  |
| Aromatic compound degradation                                       | 1               | 0.4226           | 0.4226           |
| Hydrocarbon degradation                                             | 0.0602          | <b>0.029*</b>    | 0.5421           |
| Iron respiration                                                    | 0.0584          | 0.3897           | 0.0587           |
| Nitrate respiration                                                 | 0.0634          | <b>0.0198*</b>   | 0.3785           |
| Nitrate reduction                                                   | <b>0.0268*</b>  | 0.2846           | <b>0.0277*</b>   |
| Nitrogen respiration                                                | <b>0.0327*</b>  | <b>0.0104*</b>   | <b>0.0095**</b>  |
| Fumarate respiration                                                | <b>0.0268*</b>  | 0.2846           | <b>0.0277*</b>   |
| Intracellular parasites                                             | 0.0634          | <b>0.0198*</b>   | 0.3785           |
| Predatory or exoparasitic                                           | <b>0.005**</b>  | <b>0.0213*</b>   | <b>0.0073**</b>  |
| Chloroplasts                                                        | 0.8615          | 0.0867           | 0.0766           |
| Anoxygenic photoautotrophy S oxidizing                              | <b>0.0233*</b>  | 0.057            | <b>0.0229*</b>   |
| Anoxygenic photoautotrophy                                          | <b>0.0312*</b>  | <b>0.004**</b>   | <b>0.005**</b>   |
| Photoautotrophy                                                     | <b>0.0312*</b>  | <b>0.004**</b>   | <b>0.005**</b>   |
| Phototrophy                                                         | <b>0.0312*</b>  | <b>0.004**</b>   | <b>0.005**</b>   |
| Chemoheterotrophy                                                   | <b>0.0312*</b>  | <b>0.004**</b>   | <b>0.005**</b>   |

**Note:** DYH indicates seagrass *Halophila ovalis* from Daya Bay; SYT indicates seagrass *Thalassia hemprichii* from Sanya Bay, XST, XSH, XSC, and XSS indicate *T. hemprichii*, *H. ovalis*, *Cymodocea nodos* and *Syringodium isoetifolium* collected from the Xisha Islands, and NSH and NST indicates seagrass *H. ovalis* and *T. hemprichii* collected from the Nansha Islands; Values in the table represent *p* values (\* *p* < 0.05, \*\* *p* < 0.01, and \*\*\* *p* < 0.001).

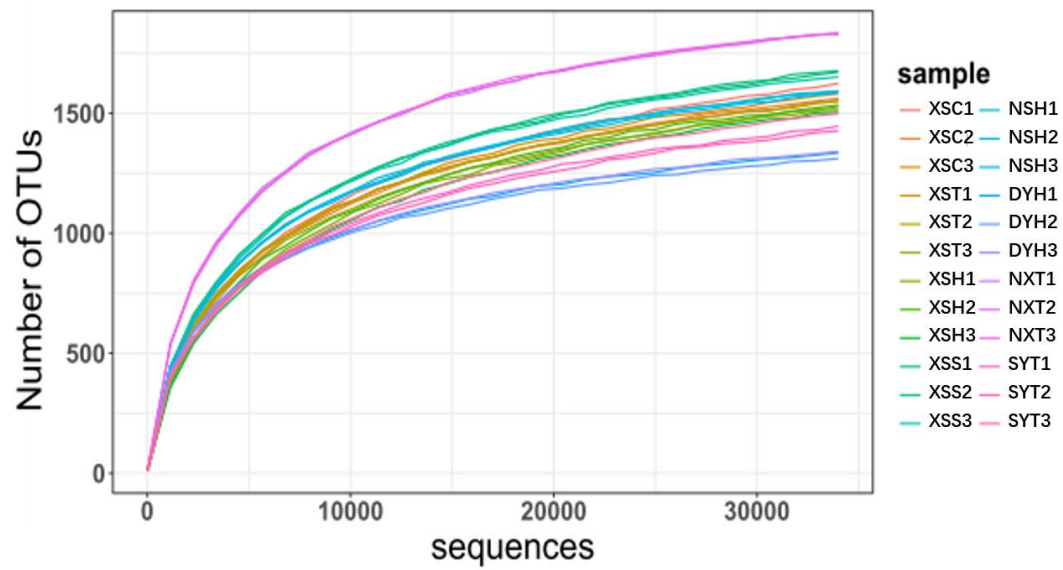

**Figure S1 Rarefaction** curves of OTU diversity in each sample (n=24) (DYH indicates seagrass *Halophila ovalis* from Daya Bay; SYT indicates seagrass *Thalassia hemprichii* from Sanya Bay, XST, XSH, XSC, and XSS indicate *T. hemprichii*, *H. ovalis*, *Cymodocea nodos* and *Syringodium isoetifolium* collected from the Xisha Islands, and NSH and NST indicates seagrass *H. ovalis* and *T. hemprichii* collected from the Nansha Islands)

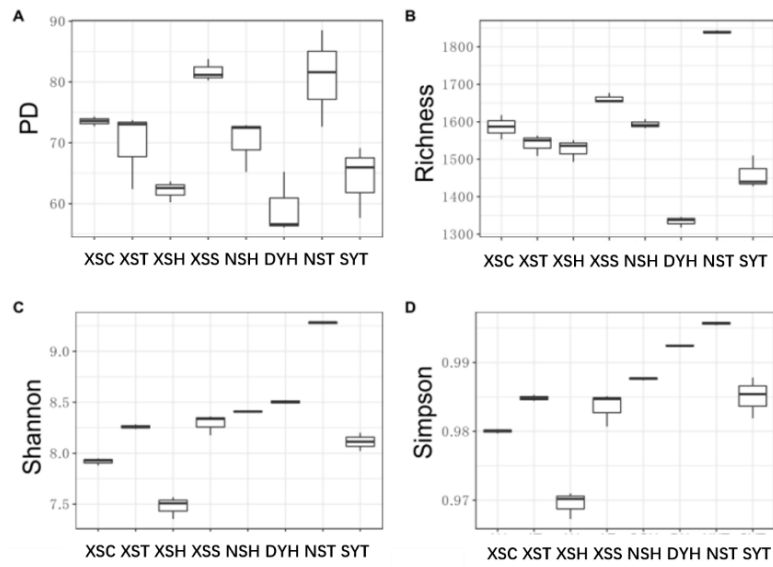

**Figure S2. Phylogenetic and taxonomic alpha diversity of seagrass rhizosphere microbial communities (A: phylogenetic diversity; B: richness; C: Shannon; D: Simpson)** ((DYH indicates seagrass *Halophila ovalis* from Daya Bay; SYT indicates seagrass *Thalassia hemprichii* from Sanya Bay, XST, XSH, XSC, and XSS indicate *T. hemprichii*, *H. ovalis*, *Cymodocea nodos* and *Syringodium isoetifolium* collected from the Xisha Islands, and NSH and NST indicates seagrass *H. ovalis* and *T. hemprichii* collected from the Nansha Islands))

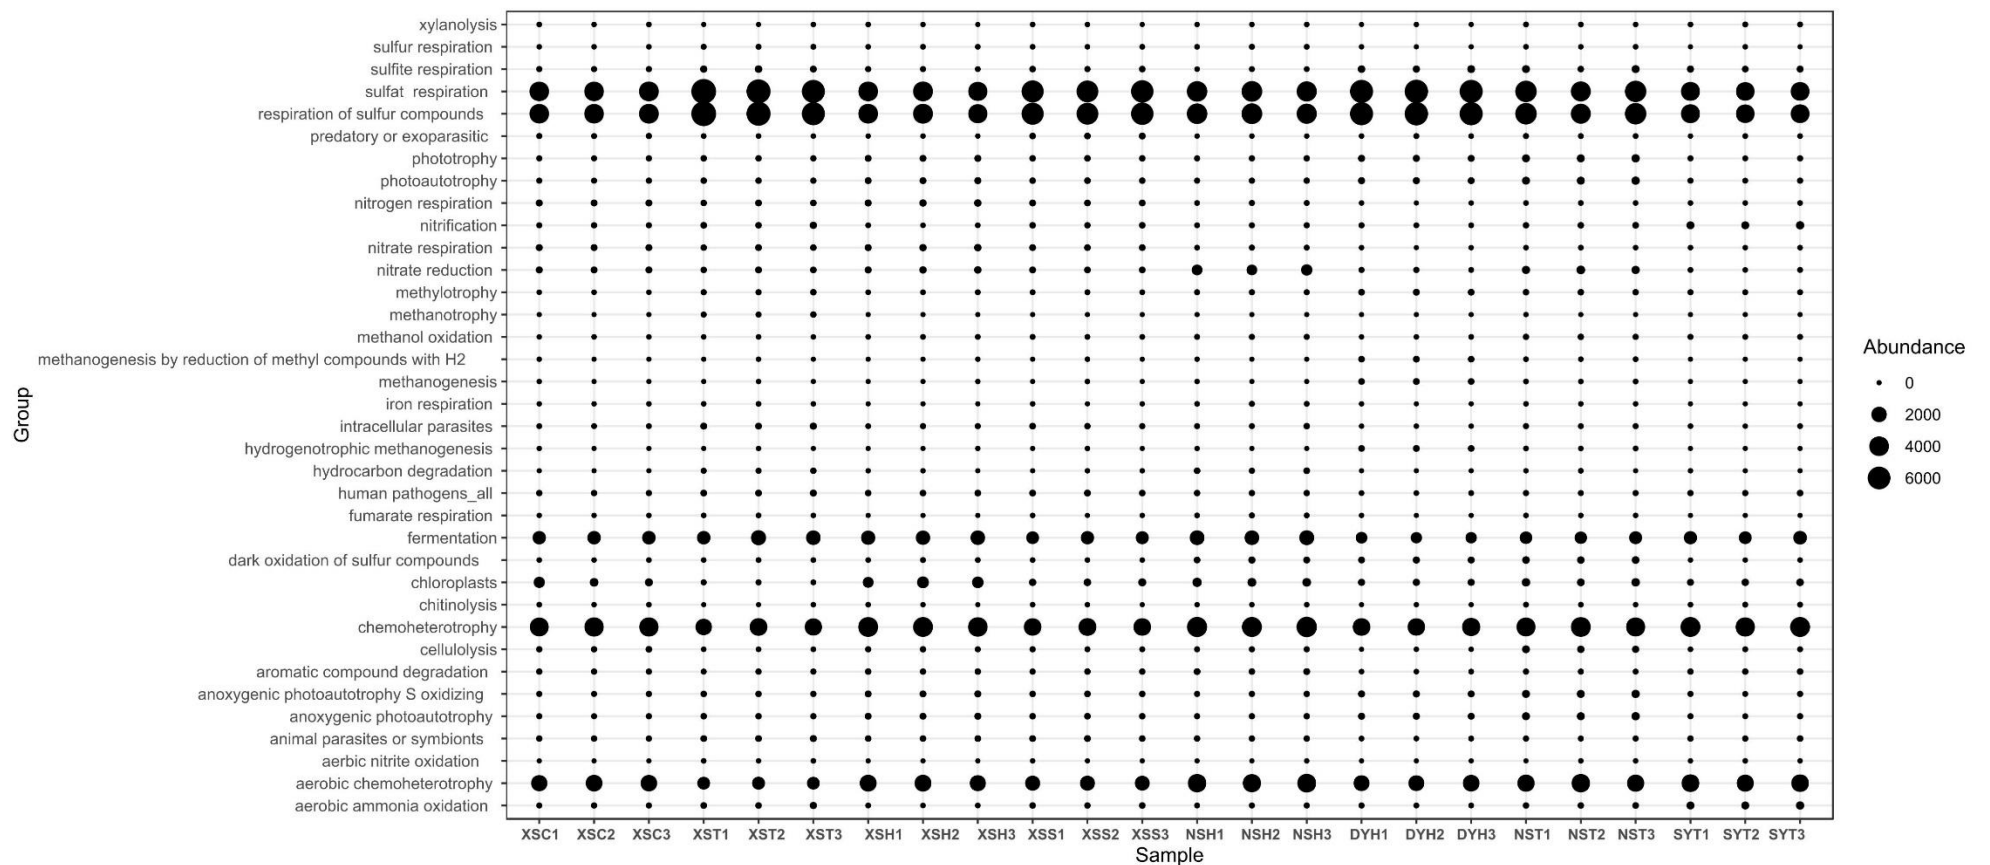

**Figure S3.** The bubble plot of functional groups in all rhizosphere microbial communities of seagrass (DYH indicates seagrass *Halophila ovalis* from Daya Bay; SYT indicates seagrass *Thalassia hemprichii* from Sanya Bay, XST, XSH, XSC, and XSS indicate *T. hemprichii*, *H. ovalis*, *Cymodocea nodos* and *Syringodium isoetifolium* collected from the Xisha Islands, and NSH and NST indicates seagrass *H. ovalis* and *T. hemprichii* collected from the Nansha Islands)

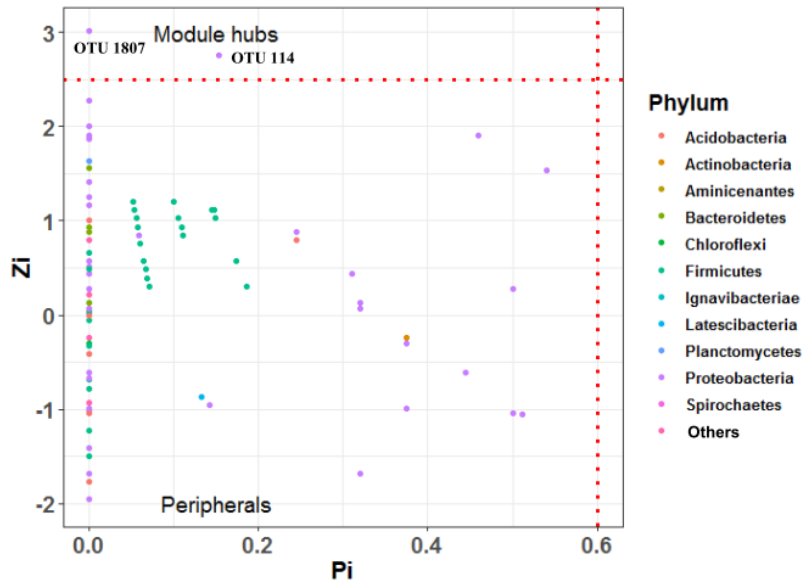

**Figure S4.** Zi-Pi plot of network nodes of core microbial community shared by all samples ((DYH indicates seagrass *Halophila ovalis* from Daya Bay; SYT indicates seagrass *Thalassia hemprichii* from Sanya Bay, XST, XSH, XSC, and XSS indicate *T. hemprichii*, *H. ovalis*, *Cymodocea nodos* and *Syringodium isoetifolium* collected from the Xisha Islands, and NSH and NST indicates seagrass *H. ovalis* and *T. hemprichii* collected from the Nansha Islands))
